# Supplementary material for: Control of working memory by phase–amplitude coupling of human hippocampal neurons
Source: PubMed Central journal article supplement (PMC11078732; doi:10.1038/s41586-024-07309-z), 2024-04-17
Supplement: 41586_2024_7309_MOESM2_ESM.pdf [file 41586_2024_7309_MOESM2_ESM.pdf]

## Reporting Summary

Nature Portfolio wishes to improve the reproducibility of the work that we publish. This form provides structure for consistency and transparency in reporting. For further information on Nature Portfolio policies, see our [Editorial Policies](#) and the [Editorial Policy Checklist](#).

### Statistics

For all statistical analyses, confirm that the following items are present in the figure legend, table legend, main text, or Methods section.

n/a Confirmed

- The exact sample size ( $n$ ) for each experimental group/condition, given as a discrete number and unit of measurement
- A statement on whether measurements were taken from distinct samples or whether the same sample was measured repeatedly
- The statistical test(s) used AND whether they are one- or two-sided  
*Only common tests should be described solely by name; describe more complex techniques in the Methods section.*
- A description of all covariates tested
- A description of any assumptions or corrections, such as tests of normality and adjustment for multiple comparisons
- A full description of the statistical parameters including central tendency (e.g. means) or other basic estimates (e.g. regression coefficient) AND variation (e.g. standard deviation) or associated estimates of uncertainty (e.g. confidence intervals)
- For null hypothesis testing, the test statistic (e.g.  $F$ ,  $t$ ,  $r$ ) with confidence intervals, effect sizes, degrees of freedom and  $P$  value noted  
*Give  $P$  values as exact values whenever suitable.*
- For Bayesian analysis, information on the choice of priors and Markov chain Monte Carlo settings
- For hierarchical and complex designs, identification of the appropriate level for tests and full reporting of outcomes
- Estimates of effect sizes (e.g. Cohen's  $d$ , Pearson's  $r$ ), indicating how they were calculated

*Our web collection on [statistics for biologists](#) contains articles on many of the points above.*

### Software and code

Policy information about [availability of computer code](#)

**Data collection** Neurophysiological data were collected using the ATLAS (Neuralynx Inc. @ CSMC and UHN) or Blackrock system (Blackrock Neurotech Inc. @ JHU) and hybrid Behnke-Fried depth electrodes (Ad-Tech Inc.). See detailed description in the Methods section. Data is available for download at <https://dandiarchive.org/dandiset/000673>

**Data analysis** Data analyses were performed using MATLAB 2019b, Fieldtrip 20200409, EEGLAB 2019.1, Python 3.10, and bicycle 1.1. Spike sorting was done using OSort 4.1 (<https://rutishauserlab.org/osort>). Anatomical data analysis was performed using FreeSurfer 6 ([surfer.nmr.mgh.harvard.edu](https://surfer.nmr.mgh.harvard.edu)). Localization of electrodes was visualized using the CIT168 atlas (<https://osf.io/r2hvk/>) and the brainnetome atlas (<https://atlas.brainnetome.org/>). Bayes factors were calculated using the BayesFactor toolbox (<https://zenodo.org/records/7006300>). Specific functions used in this study are described in the Methods section. Code is available for download at <https://zenodo.org/doi/10.5281/zenodo.10494533>

For manuscripts utilizing custom algorithms or software that are central to the research but not yet described in published literature, software must be made available to editors and reviewers. We strongly encourage code deposition in a community repository (e.g. GitHub). See the Nature Portfolio [guidelines for submitting code & software](#) for further information.

## Data

Policy information about [availability of data](#)

All manuscripts must include a [data availability statement](#). This statement should provide the following information, where applicable:

- Accession codes, unique identifiers, or web links for publicly available datasets
- A description of any restrictions on data availability
- For clinical datasets or third party data, please ensure that the statement adheres to our [policy](#)

All data used in this study are publicly available in the DANDI Archive59 (<https://dandiarchive.org/dandiset/000673/0.240118.2135>). The published data set contains the timestamps and waveforms of the sorted neurons, LFPs, electrode coordinates, behavioral data, as well as the stimuli, triggers, experimental parameters, anonymized patient metadata of each session.

## Research involving human participants, their data, or biological material

Policy information about studies with [human participants or human data](#). See also policy information about [sex, gender \(identity/presentation\), and sexual orientation](#) and [race, ethnicity and racism](#).

|                                                                    |                                                                                                                                                                                                                                                                                                                                                                                                                                              |
|--------------------------------------------------------------------|----------------------------------------------------------------------------------------------------------------------------------------------------------------------------------------------------------------------------------------------------------------------------------------------------------------------------------------------------------------------------------------------------------------------------------------------|
| Reporting on sex and gender                                        | The methods section contains the self-reported gender for all patients.                                                                                                                                                                                                                                                                                                                                                                      |
| Reporting on race, ethnicity, or other socially relevant groupings | We do not use nor report socially relevant categorization variables in our study.                                                                                                                                                                                                                                                                                                                                                            |
| Population characteristics                                         | We studied a group of 36 patients (21 females, 15 males) with an average age of $40.5 \pm 13.8$ years. All patients were diagnosed with pharmacologically-intractable epilepsy. Supplementary table S5 provides information about each patient.                                                                                                                                                                                              |
| Recruitment                                                        | Patients undergoing invasive electrophysiological recording for clinical purposes were recruited and consented to participate in this research study. Patients who were capable of and willing to participate in the task were recruited. All patients who spoke english and had a sufficient level of cognitive function were offered participation. Potential biases include subjects who do not speak english and low cognitive function. |
| Ethics oversight                                                   | The study was approved by the institutional review boards of Cedars-Sinai Medical Center, Toronto Western Hospital, and John's Hopkins School of Medicine. Patients provided informed consent.                                                                                                                                                                                                                                               |

Note that full information on the approval of the study protocol must also be provided in the manuscript.

## Field-specific reporting

Please select the one below that is the best fit for your research. If you are not sure, read the appropriate sections before making your selection.

Life sciences       Behavioural & social sciences       Ecological, evolutionary & environmental sciences

For a reference copy of the document with all sections, see [nature.com/documents/nr-reporting-summary-flat.pdf](https://nature.com/documents/nr-reporting-summary-flat.pdf)

## Life sciences study design

All studies must disclose on these points even when the disclosure is negative.

|                 |                                                                                                                                                                                                                                                                                                                                                                          |
|-----------------|--------------------------------------------------------------------------------------------------------------------------------------------------------------------------------------------------------------------------------------------------------------------------------------------------------------------------------------------------------------------------|
| Sample size     | Our analysis is based on 1452 neurons recorded from 36 patients. No statistical methods were used to pre-determine sample sizes.                                                                                                                                                                                                                                         |
| Data exclusions | We excluded individual channels and trials that contained epileptic activity, electrical artifacts or movement-related electrical noise. The methods section contains detailed descriptions of the criteria used to exclude these data. These exclusion criteria were not pre-established but are commonly used.                                                         |
| Replication     | The analyses were performed at the single neuron and channel level. The effects reported in the study were consistent and replicated across 36 subjects.                                                                                                                                                                                                                 |
| Randomization   | Our design is a within-subject analysis: all the patients were in the same analysis set and had all types of trials. We performed permutation testing where appropriate to ensure statistical validity of our results.                                                                                                                                                   |
| Blinding        | Patients were not aware of the goals of the study. There was no subjective measurement or decision that the investigator needed to make during the experiment. All the data are collected and analyzed off-line. Data collection and analysis were not performed blind to the conditions of the experiments as conditional information is required for further analyses. |

## Reporting for specific materials, systems and methods

We require information from authors about some types of materials, experimental systems and methods used in many studies. Here, indicate whether each material, system or method listed is relevant to your study. If you are not sure if a list item applies to your research, read the appropriate section before selecting a response.

### Materials & experimental systems

- | n/a                                 | Included in the study                                  |
|-------------------------------------|--------------------------------------------------------|
| <input checked="" type="checkbox"/> | <input type="checkbox"/> Antibodies                    |
| <input checked="" type="checkbox"/> | <input type="checkbox"/> Eukaryotic cell lines         |
| <input checked="" type="checkbox"/> | <input type="checkbox"/> Palaeontology and archaeology |
| <input checked="" type="checkbox"/> | <input type="checkbox"/> Animals and other organisms   |
| <input checked="" type="checkbox"/> | <input type="checkbox"/> Clinical data                 |
| <input checked="" type="checkbox"/> | <input type="checkbox"/> Dual use research of concern  |
| <input checked="" type="checkbox"/> | <input type="checkbox"/> Plants                        |

### Methods

- | n/a                                 | Included in the study                           |
|-------------------------------------|-------------------------------------------------|
| <input checked="" type="checkbox"/> | <input type="checkbox"/> ChIP-seq               |
| <input checked="" type="checkbox"/> | <input type="checkbox"/> Flow cytometry         |
| <input checked="" type="checkbox"/> | <input type="checkbox"/> MRI-based neuroimaging |
